# Supplementary material for: Traction force measurements on male Strepsiptera (Insecta) revealed higher forces on smooth compared with hairy substrates
Source: Oxford University Press journal article supplement (doi:10.1242/jeb.223784), 2020-07-27
Supplement: jeb223784supp.pdf [file jeb223784supp.pdf]

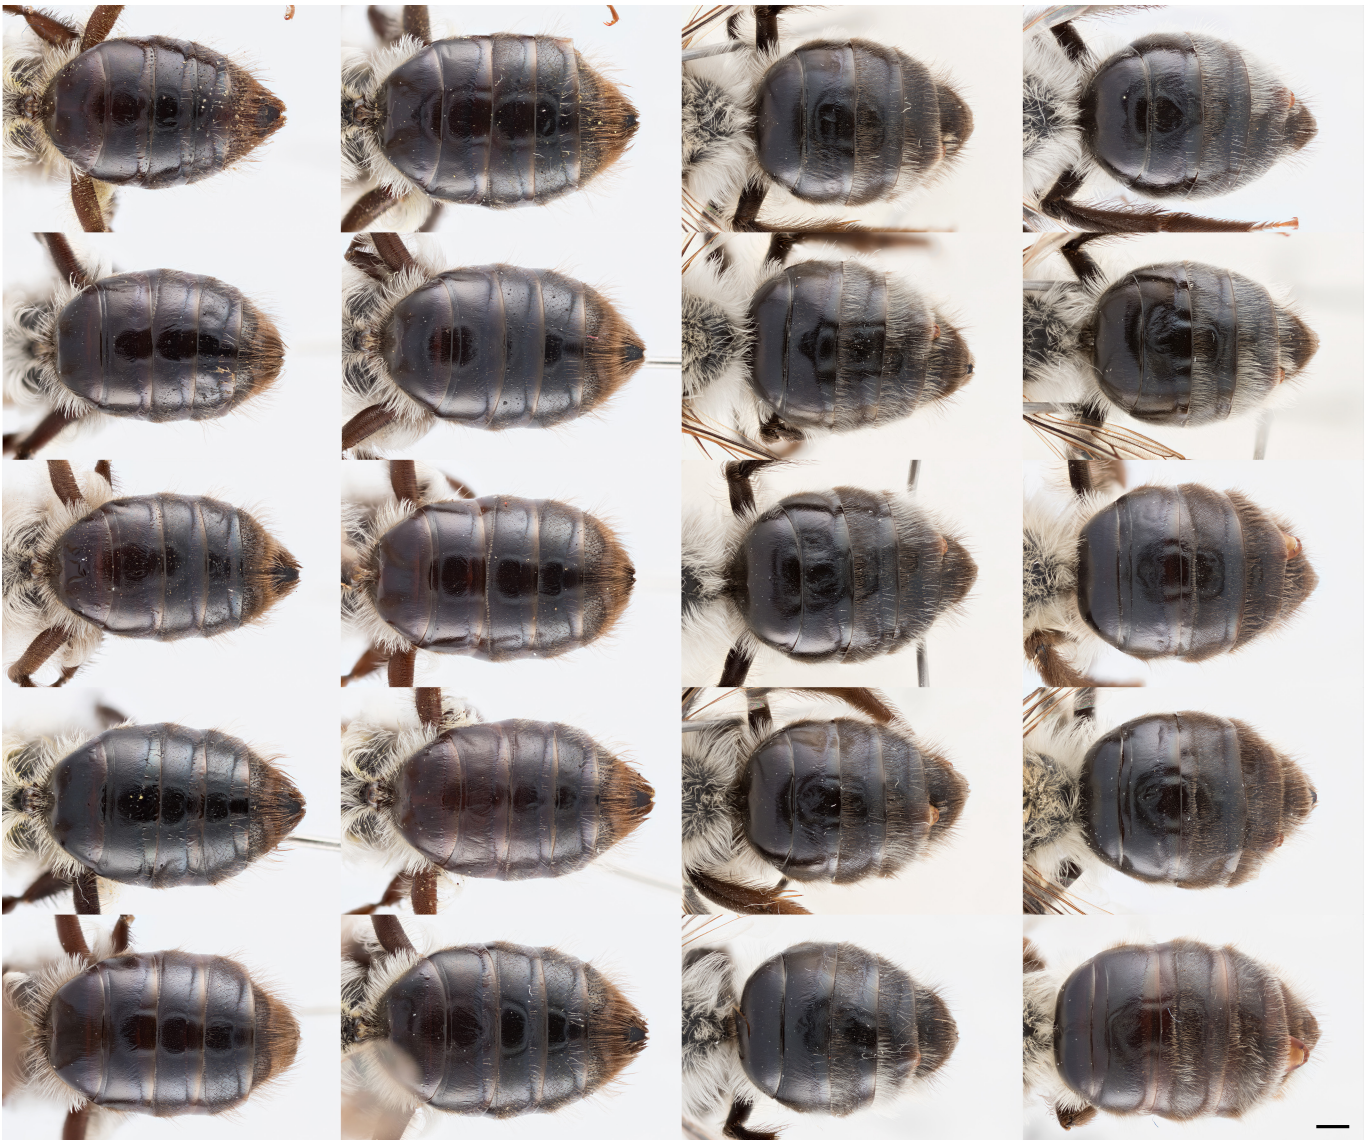

**Figure S1.** Related to Figure 2. Comparison of hairiness of the tergites of the abdomen of unfested (left) and stylopized females of *Andrena vaga* (right). Scale bar: 1 mm.

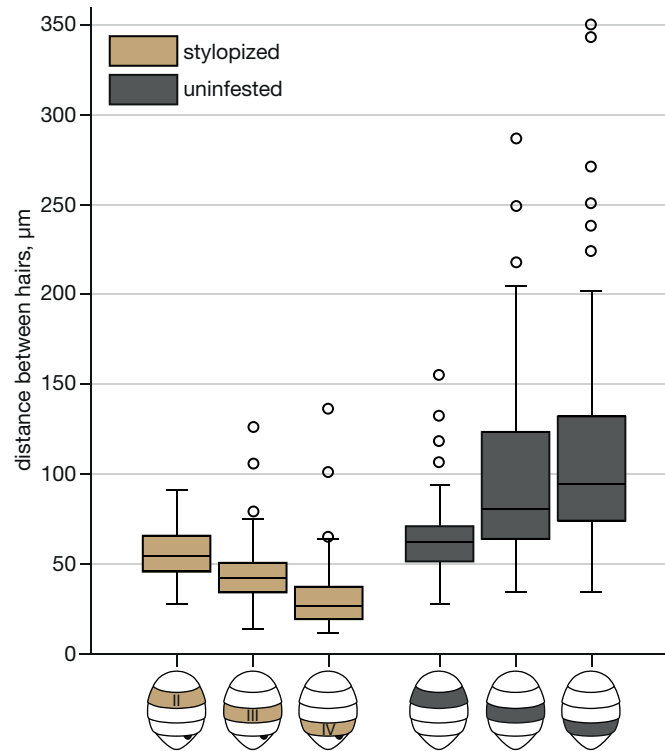

Figure S2. Distance between hairs of the abdominal tergites II-IV of the abdomen of stylized and uninfested females of *Andrena vaga*.

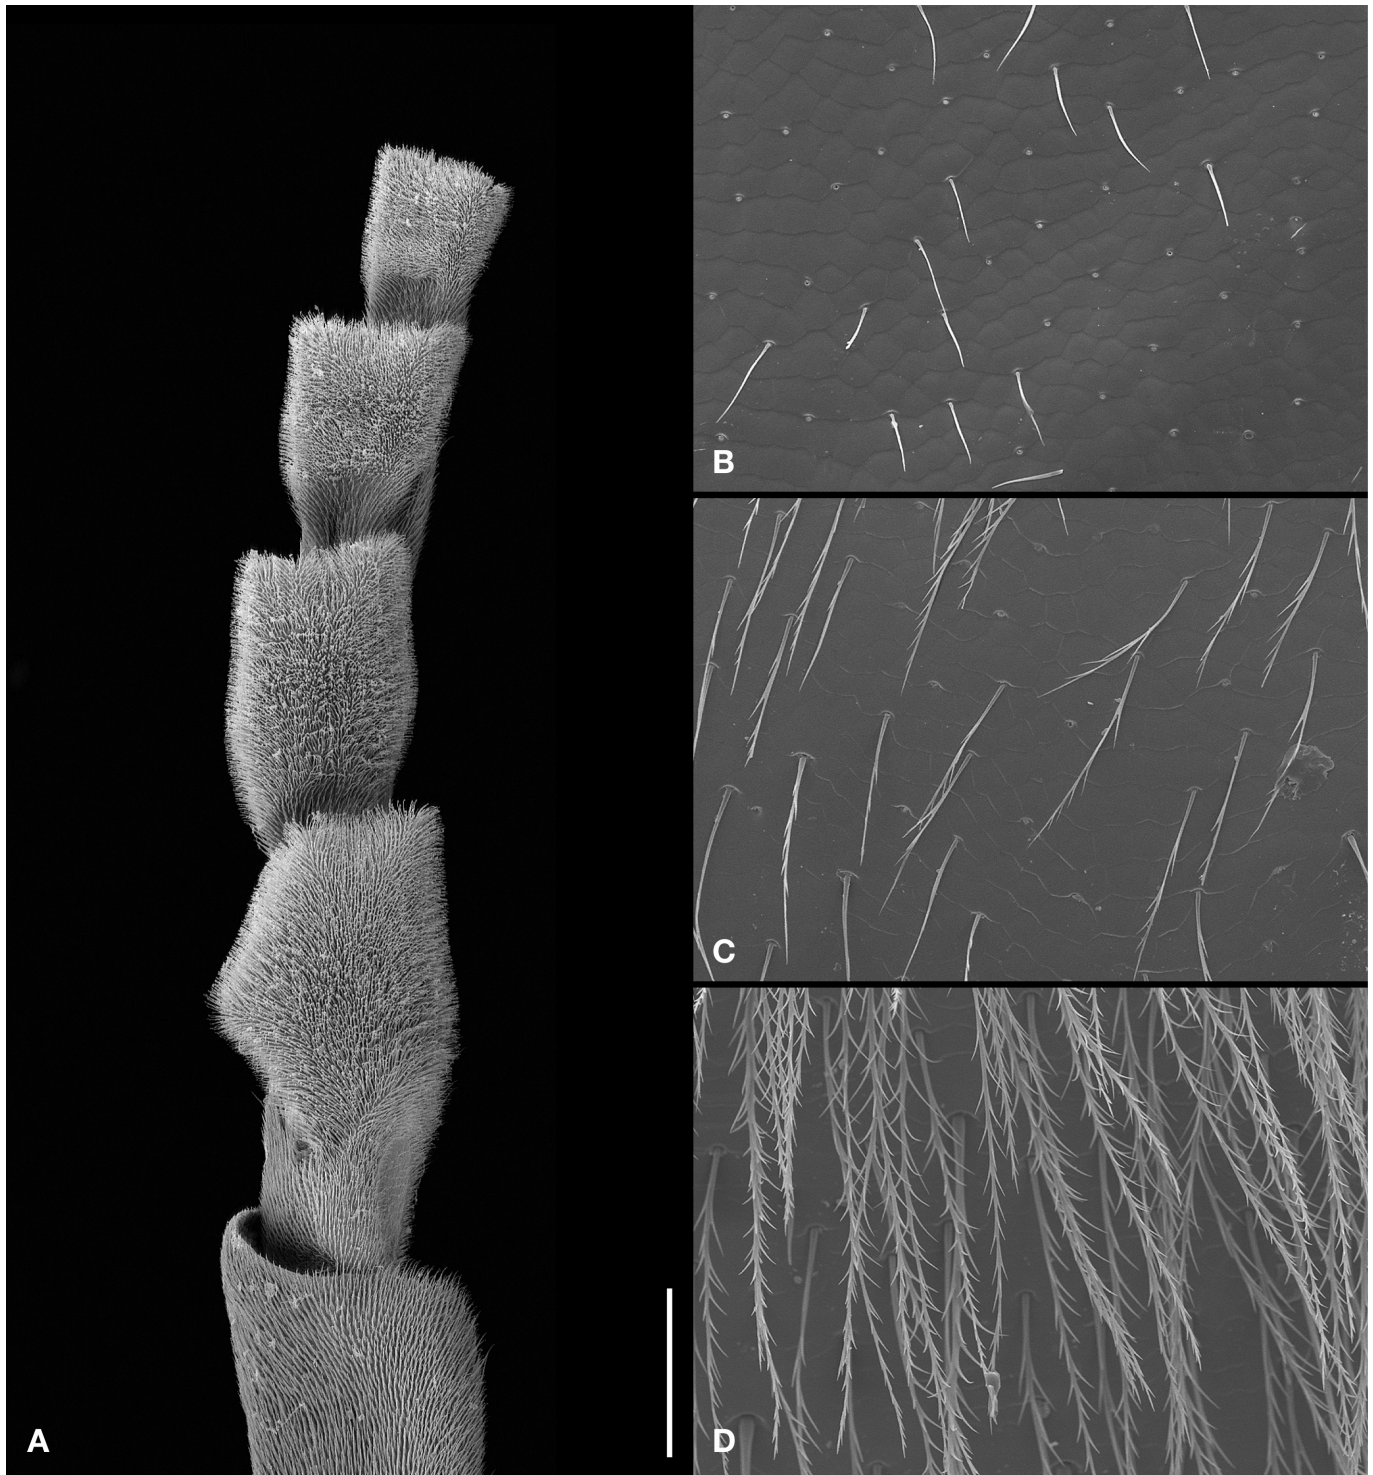

**Figure S3.** Tarsus of *Stylops ovinae* (A) and hairiness of the abdominal tergites II–IV of a stylized *Andrena vaga* (B–D), SEM-micrographs. (A) Prothoracic leg, ventral view (modified from Pohl & Beutel, 2004). (B) Abdominal tergite II. (C) Abdominal tergite III. (D) Abdominal tergite IV. Scale bar: 100  $\mu$ m.

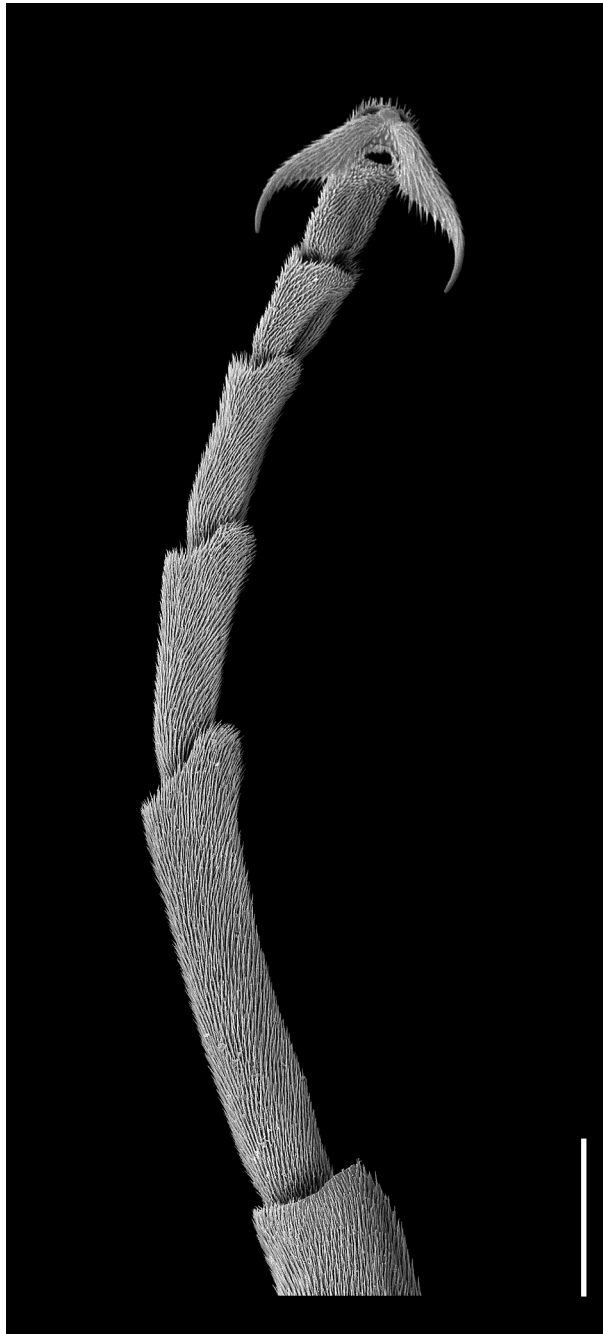

**Figure S4.** *Mogenilla moldrzyki* (Mogenillidae), male, tarsus of metathoracic leg, ventral view, SEM-micrograph (modified from Pohl & Beutel, 2004). Scale bar: 100  $\mu\text{m}$ .

**Table S1.** Distance ( $\mu\text{m}$ ) between hairs of abdominal tergites II–IV of styloized and uninfested *Andrena vaga*.

|             | Styloized |      |       |      |             | Uninfested |      |       |      |
|-------------|-----------|------|-------|------|-------------|------------|------|-------|------|
|             | average   | med. | max.  | min. |             | average    | med. | max.  | min. |
| Tergite II  | 55.6      | 54.8 | 91.3  | 27.7 | Tergite II  | 63.1       | 62.3 | 155.2 | 28.3 |
| Tergite III | 43.9      | 41.7 | 126.5 | 13.4 | Tergite III | 98.5       | 80.7 | 286.9 | 34.3 |
| Tergite IV  | 30.3      | 26.5 | 136.7 | 11.4 | Tergite IV  | 111.1      | 94.3 | 350.5 | 34.3 |
